# Supplementary material
Source: Royal Society of Chemistry journal article supplement (doi:10.1039/d6nj00043f)
Supplement: d6nj00043f1.pdf [file d6nj00043f1.pdf]

## High-Strength, Anti-Freezing and Recyclable Soy Protein isolate/Poly(vinyl alcohol) Gels Empowered by Deep Eutectic Solvent-Augmented Hofmeister Effect

Guoquan Zhang<sup>a,b</sup>, Yongchang Chen<sup>a</sup>, Gao Xiao<sup>b,\*</sup>, Xiancai Jiang<sup>a,\*</sup>

<sup>a</sup> School of Chemical Engineering, Fuzhou University, Fuzhou 350108, China;

<sup>b</sup> College of Environment & Safety Engineering, Fuzhou University, Fuzhou 350108, China.

**Email:** xiaogao@fzu.edu.cn; jiangxc@fzu.edu.cn

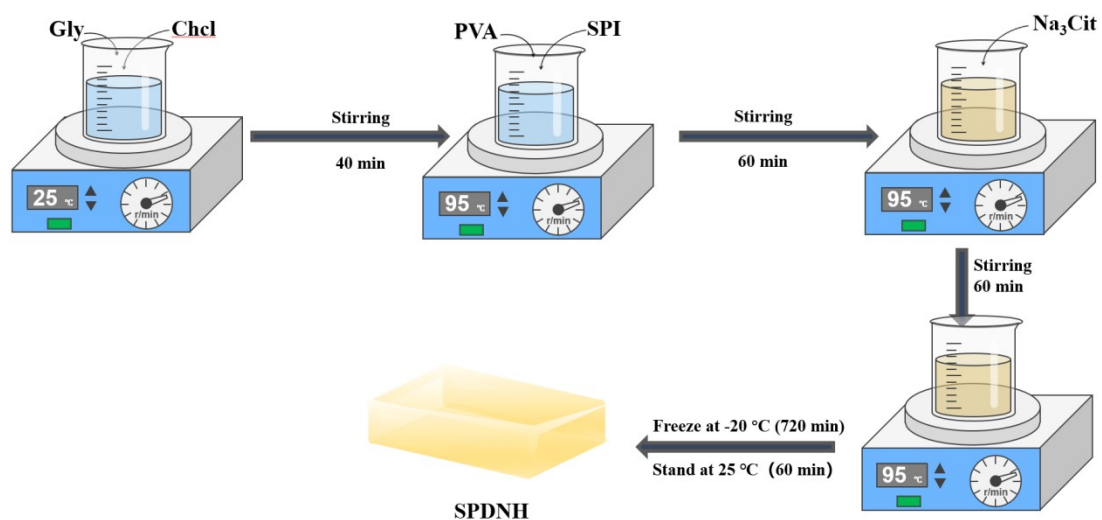

Fig. S1. The preparation process of SPDNH

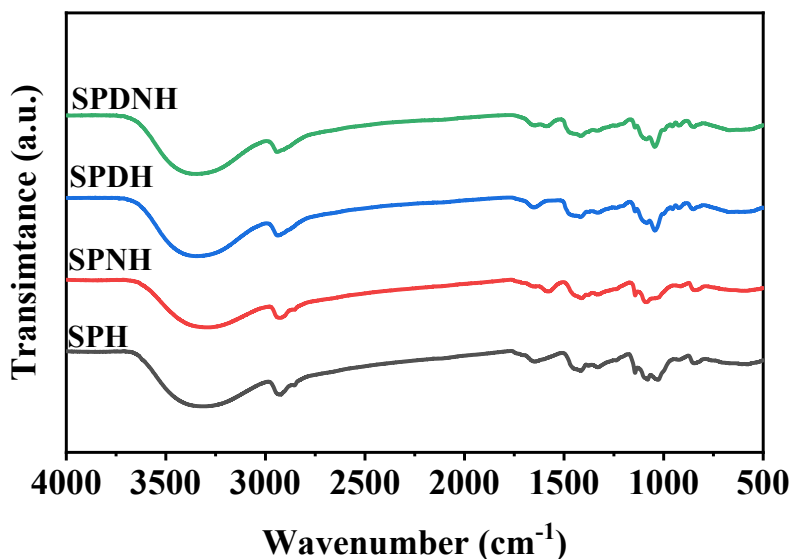

Fig. S2. FTIR spectra of SPH, SPNG, SPDH, and SPDNH

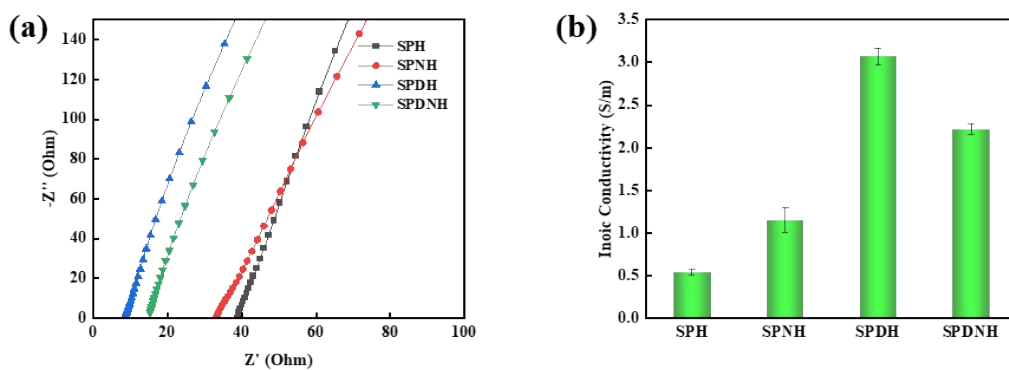

Fig. S3. (a) EIS plots and (b) conductivity of SPH, SPNG, SPDH, and SPDNH

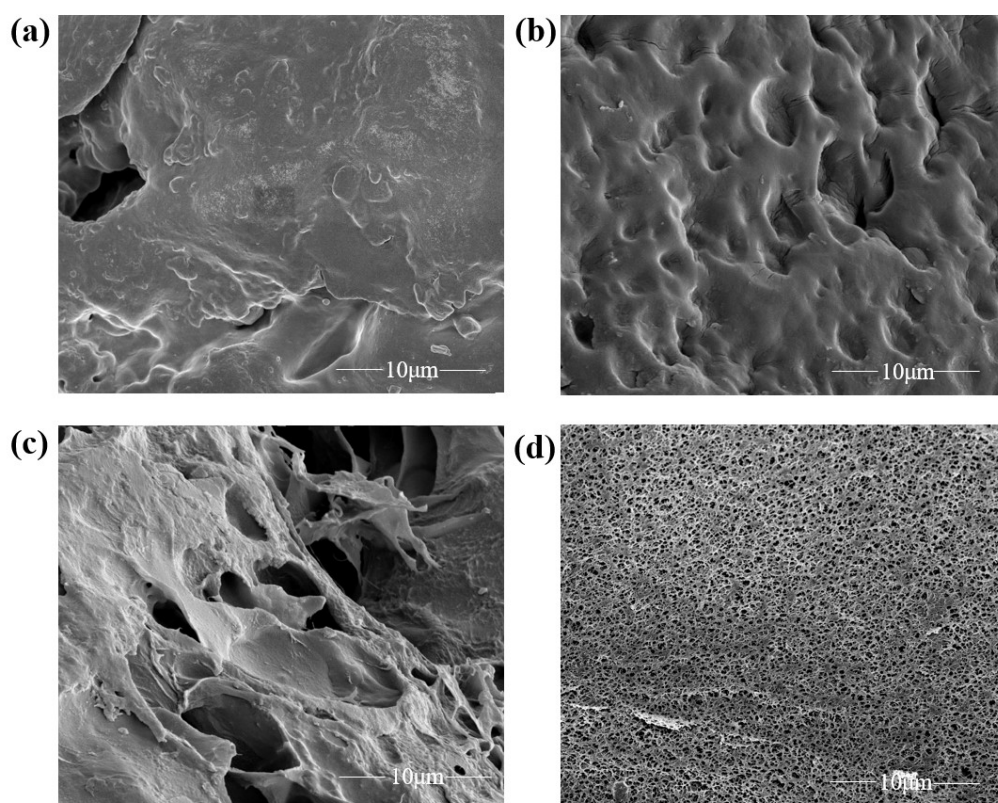

Fig. S4. SEM images of (a) SPH, (b) SPNH, (c) SPDH, and (d) SPDNH

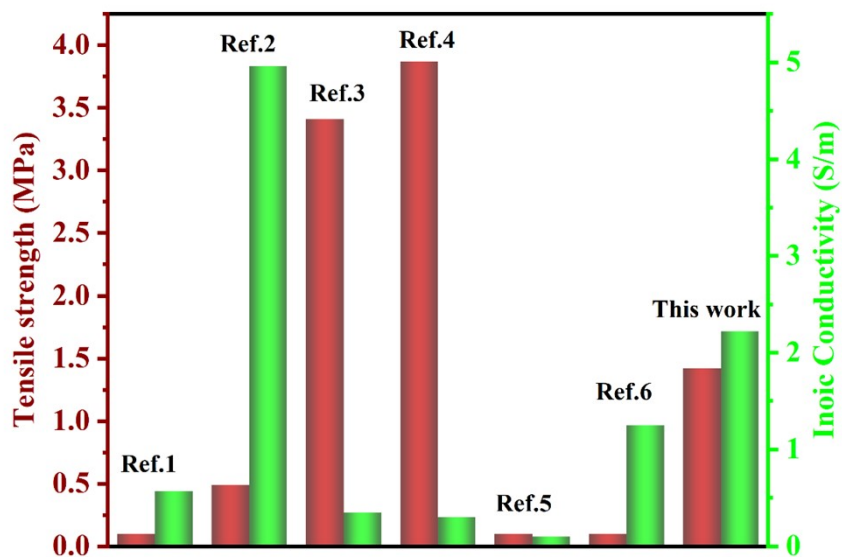

Fig. S5 Comparison of tensile strength and ionic conductivity of this work with those reported in the literature

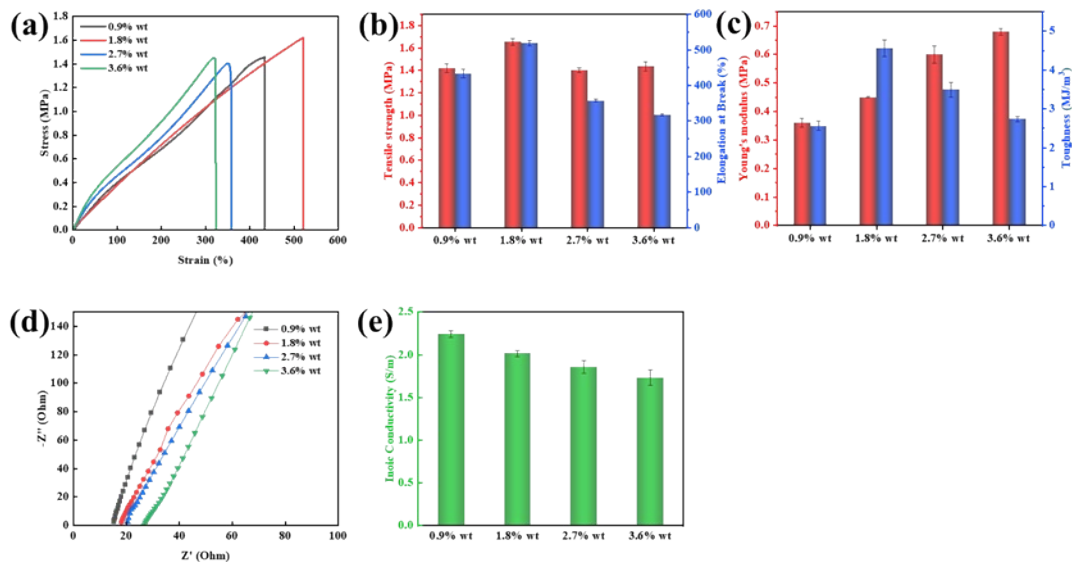

Fig. S6. Four different  $\text{Na}_3\text{Cit}$  addition amounts (The percentage of  $\text{Na}_3\text{Cit}$  in the system mass fraction) (a) Tensile stress-strain curves of hydrogels. (b) Tensile strength and elongation at break. (c) Young's modulus and toughness. (d) EIS plots and (e) conductivity

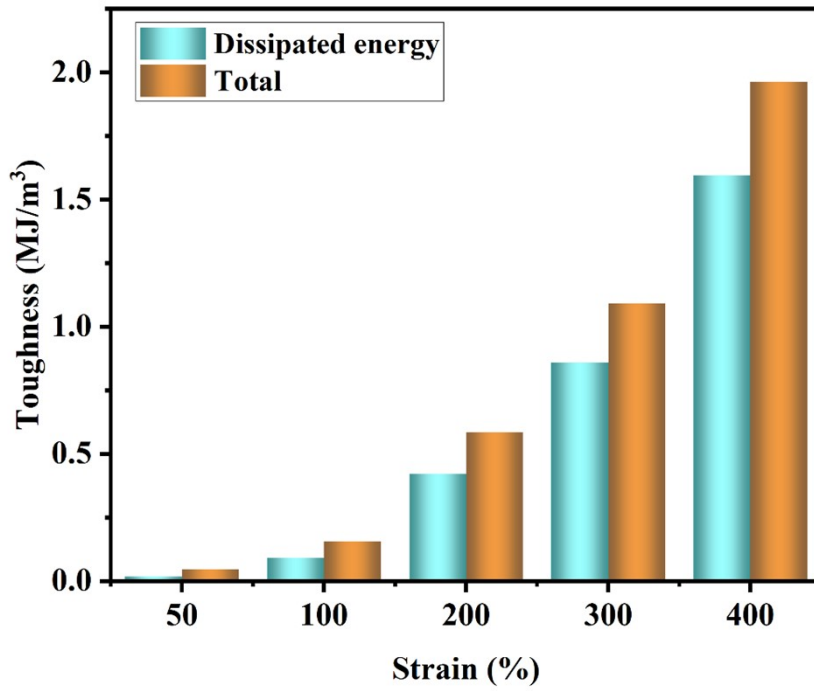

Fig. S7. Total energy and dissipated energy of SPDNH under different strains

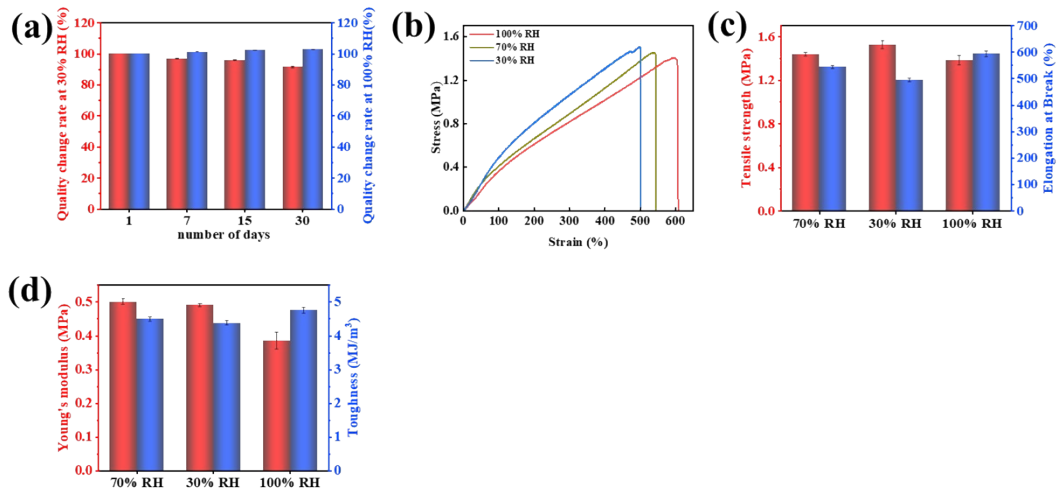

Fig. S8. (a) The quality changes of SPDNH 1.7.15 at 30%RH, 70%RH, and 100%RH over a period of 30 days. (b) Stress-strain curves, (c) tensile strength and elongation at break, (d) Young's modulus and toughness of SPDNH after being placed at 30%RH, 70%RH, and 100%RH for 30 days.

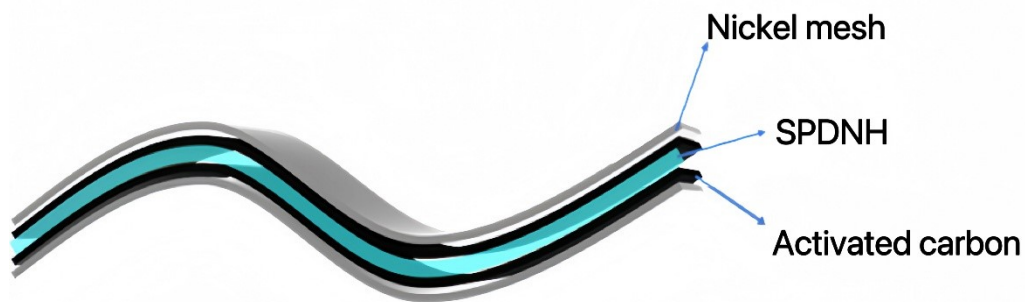

Fig. S9. Schematic diagram of the composition of the flexible all-solid-state supercapacitor

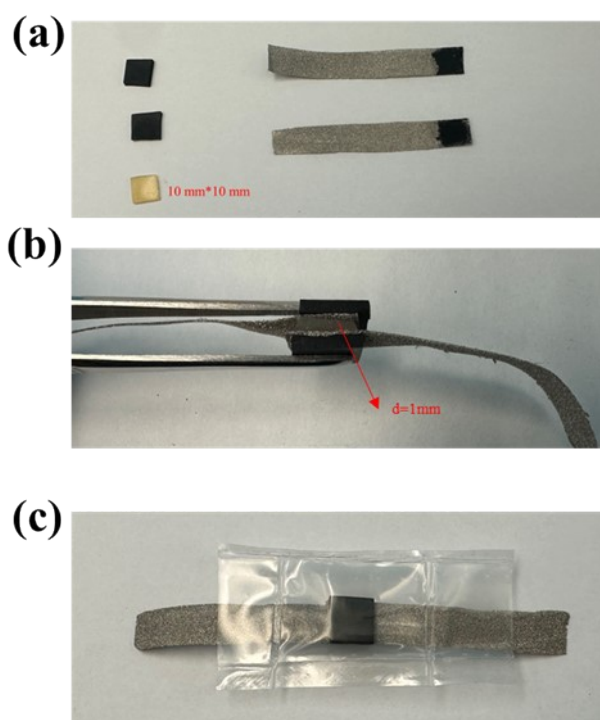

Fig. S10 (a) Composition of supercapacitors; gel, nickel mesh coated with electrode materials, and insulating sheet; (b) Side view diagram of supercapacitor; (c) Supercapacitor after planar plastic packaging

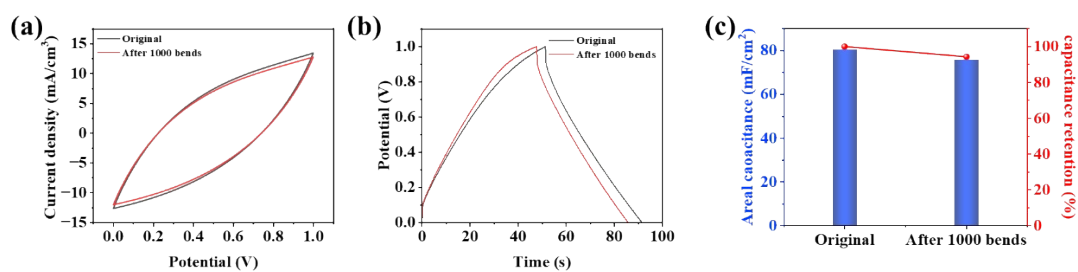

Fig. S11. Supercapacitor after being bent 1000 times: (a) CV curves (100 mV/s), (b) GCD curves (2 mA/cm<sup>2</sup>), at different temperatures: (c) area-specific capacitance and capacitance retention.

Table. S1. Comparison of tensile strength and ionic conductivity with those reported in the

## literature

| Component<br>s of DES | Polymer<br>matrix | Tensile<br>strength(MPa) | Elongation<br>at break(%) | Conductivity<br>(S/m) | Freezing<br>(°C) | Ref          |
|-----------------------|-------------------|--------------------------|---------------------------|-----------------------|------------------|--------------|
| ChCl/Gly              | SPI/PV<br>A       | 1.68                     | 518.8                     | 2.01                  | 33               | This<br>work |
| ChCl/EG               | PVA               | 0.85                     | 320                       | 1.85                  | -25              | [7]          |
| ChCl/Urea             | PAAM              | 0.42                     | 580                       | 1.20                  | -20              | [8]          |
| Bet/Gly               | PAA               | 1.20                     | 450                       | 1.60                  | -28              | [9]          |
| Bet/EG                | PAA               | 0.246                    | 712.9                     | 0.741                 | -117.4           | [10]         |
| ChCl/Gly              | HEAA              | 0.42                     | 5000                      | 0.42                  | -80              | [11]         |
| ChCl/AM               | PAM               | 0.184                    | 5063                      | 0.43                  | \                | [12]         |

Table. S2 Comparison of electrochemical performance data

| Capacitance<br>(mF/cm <sup>2</sup> ) | Operating<br>temperature (°C) | Conductivity<br>(S/m) | Energy density<br>(μWh/cm <sup>2</sup> ) | Cycling stability<br>(%) | Ref          |
|--------------------------------------|-------------------------------|-----------------------|------------------------------------------|--------------------------|--------------|
| 125.61                               | -20-80                        | 2.01                  | 17.45                                    | 80.20% (1000 cycles)     | This<br>work |
| 103.6                                | 15-25                         | 6.54                  | 14.39                                    | 81.90% (8000 cycles)     | [13]         |
| 163.6                                | /                             | 1.36                  | /                                        | 86.00% (10000<br>cycles) | [14]         |
| 136.9                                | 25                            | 4.84                  | 17.9                                     | 83.40% (1000 cycles)     | [15]         |
| 113.76                               | -15-80                        | 1.72                  | 15.80                                    | 81.62% (1000 cycles)     | [16]         |
| 35                                   | /                             | /                     | /                                        | 58-61% (3000<br>cycles)  | [17]         |

## References

- [1] Zhao K, Wang J, Wu Y, et al. Silk fibroin-based hydrogels with low hysteresis, self-adhesion, and tunable ionic conductivity for wearable devices. *International Journal of Biological Macromolecules* 2025; 306: 141597. <https://doi.org/10.1016/j.ijbiomac.2025.141597>.
- [2] Yu Y, Zhou Z, Ruan H, et al. High conductivity, low-hysteresis, flexible PVA hydrogel multi-functional sensors: Wireless wearable sensor for health monitoring. *Chemical Engineering Journal* 2025; 505: 158877. <https://doi.org/10.1016/j.cej.2024.158877>.
- [3] Han M, Yao Z, Ye Q, et al. Construction of high strength PVA/cellulose conductive hydrogels based on sodium citrate/aluminium chloride dual ions regulation. *International Journal of Biological Macromolecules* 2024; 282: 137587. <https://doi.org/10.1016/j.ijbiomac.2024.137587>.
- [4] Huang B, Liu W, Lan Y, et al. Highly ion-conducting, robust and environmentally stable poly(vinyl alcohol) eutectic gels designed by natural polyelectrolytes for flexible wearable sensors and supercapacitors. *Chemical Engineering Journal* 2024; 480: 147888. <https://doi.org/10.1016/j.cej.2023.147888>.
- [5] Li Q, Tian B, Tang G, et al. Multifunctional conductive hydrogels for wearable sensors and supercapacitors. *J Mater Chem A* 2024; 12: 3589–600. <https://doi.org/10.1039/D3TA06771H>.
- [6] Zhu A, Xu Q, Huang J, et al. Fabrication of Gelatin-Derived Gel Electrolyte Using Deep Eutectic Solvents through In Situ Derivatization and Crosslinking Strategy for Supercapacitors and Flexible Sensors. *ACS Appl Mater Interfaces* 2023; 15: 41483–93. <https://doi.org/10.1021/acsami.3c06966>.
- [7] Zheng Y, Wu D, Wang T, et al. Advanced Eutectogel Electrolyte for High-Performance and Wide-Temperature Flexible Zinc-Air Batteries. *Angew Chem Int Ed* 2025;64:e202418223. <https://doi.org/10.1002/anie.202418223>.
- [8] Li B, Zhou M, Wu A, et al. Preparation of PVA/PVDF/PAM-U composite hydrogels by in situ polymerization of ternary DES and their properties study. *J Mater Sci* 2024;59:715–27. <https://doi.org/10.1007/s10853-023-09247-z>.
- [9] Sui X, Guo H, Chen P, et al. Zwitterionic Osmolyte-Based Hydrogels with Antifreezing Property, High Conductivity, and Stable Flexibility at Subzero Temperature. *Adv Funct Materials* 2020;30:1907986. <https://doi.org/10.1002/adfm.201907986>.
- [10] Huang L, Hua T, Huang Y, et al. DES-separated bamboo lignin-reinforced DES gels with

high conductivity, strength, flexibility, and environmental stability. *Green Chemistry* 2025;28:2495–509. <https://doi.org/10.1039/d5gc05712d>.

[11] Wei R, Yang S, Zhou C, et al. Transparent conductive eutectogels with tunable mechanical properties, environmental stability, self-adhesion and self-healing ability for multifunctional sensing and triboelectric nanogenerator. *European Polymer Journal* 2025;236:114130. <https://doi.org/10.1016/j.eurpolymj.2025.114130>.

[12] Chen C, Liu P, Gu Y, et al. Stretchable adhesive eutectic organohydrogel based on gelatin-Quaternized chitosan for wearable human motion monitoring. *International Journal of Biological Macromolecules* 2025;322:146939. <https://doi.org/10.1016/j.ijbiomac.2025.146939>.

[13] Ding J, Yang Y, Poisson J, et al. Recent Advances in Biopolymer-Based Hydrogel Electrolytes for Flexible Supercapacitors. *ACS Energy Lett* 2024;9:1803–25. <https://doi.org/10.1021/acseenergylett.3c02567>.

[14] Hu O, Lu J, Chen G, et al. An Antifreezing, Tough, Rehydratable, and Thermoplastic Poly(vinyl alcohol)/Sodium Alginate/Poly(ethylene glycol) Organohydrogel Electrolyte for Flexible Supercapacitors. *ACS Sustainable Chem Eng* 2021;9:9833–45. <https://doi.org/10.1021/acssuschemeng.1c02464>.

[15] Hu M, Ye D, Qian X, et al. Fully physically crosslinked supramolecular hydrogel with high tensile strength, low hysteresis, high adhesivity and frost resistance based on confinement effect. *Polymer* 2025;327:128404. <https://doi.org/10.1016/j.polymer.2025.128404>.

[16] Hu M, Deng Y, Qian X, et al. One-pot preparation of strong, tough, frost-resistant and recyclable organohydrogels via Hofmeister effect and its application for electronic devices. *European Polymer Journal* 2024;221:113529. <https://doi.org/10.1016/j.eurpolymj.2024.113529>.

[17] Babeli I, Ruano G, Puiggali-Jou A, et al. Self-Healable and Eco-Friendly Hydrogels for Flexible Supercapacitors. *Advanced Sustainable Systems* 2021;5:2000273. <https://doi.org/10.1002/adsu.202000273>.
